# Supplementary material
Source: PubMed Central journal article supplement (PMC152802)
Supplement: nar_31_7_1955__1.pdf [file nar_31_7_1955__1.pdf]

## Supplementary Material

**Table S2.** Gene-specific primers

| Name                    | Sequence                         |
|-------------------------|----------------------------------|
| <i>EcR</i> Up           | 5'-GGGCGCGGGCGGGCGGGTATCGG-3'    |
| <i>EcR</i> Down         | 5'-AGGTCCCTTCTTGCTCTTCTTCGC-3'   |
| <i>lbl</i> Up           | 5'-GCTATGAGCAGCGACTGGCCTGGG -3'  |
| <i>lbl</i> Down         | 5'- GGCAAATATGTTCAACGTGGCGGG -3' |
| <i>fz</i> Up            | 5'-CGCTGTGAACCCATCACCATATCG-3'   |
| <i>fz</i> Down          | 5'-TGACATGGGGCTCCACAGTCATGC-3'   |
| <i>Fur1</i> exon1 UP    | 5'-GACCCCTAGCGAAAACGAAAAGCGG-3'  |
| <i>Fur1</i> exon2 Down  | 5'-GTGGTAGTGATCATCGAAGATCTG-3'   |
| <i>Fur1</i> exon7 UP    | 5'-TACGAAGAAGTCACCATCGGTGC-3'    |
| <i>Fur1</i> exon8 Down  | 5'- CTGGTTCGACTGGCTGGGATTGGC-3'  |
| <i>lola</i> exon5 Up    | 5'-CGACAGATCTCAGGATGAACTTGG-3'   |
| <i>lola</i> exon6 Down  | 5'-GATTCAATTTTCCACCGCTACTGG-3'   |
| <i>Rx</i> Up            | 5'-ACAACTGCGCCAAGAAGAAACACC-3'   |
| <i>Rx</i> Down          | 5'-GCACCGCATCCCAGGCGATGTGGC-3'   |
| <i>skf</i> Up           | 5'-AGCAGACATGCCGTGTTTTTGTGC-3'   |
| <i>skf</i> Down         | 5'-CAGTCGACGAGTCACTGTCCTTGC-3'   |
| <i>Mio</i> exon5 Up     | 5'-AAATACTGGAAACGGCACTCAGC-3'    |
| <i>Mio</i> exon6 Down   | 5'-GGTGTCTGTGGTCCAATCGTCTGG-3'   |
| <i>Mio</i> exon1' Up    | 5'-CTTTGTGTTGCGCGTGTGTGCGTG-3'   |
| <i>Mio</i> exon2' Down  | 5'-CACAGAGACTGTTGCAGATAAGGC-3'   |
| <i>aret</i> exon3 UP    | 5'-AACGTTCTGCGGGACAAGGCTACC-3'   |
| <i>aret</i> exon12 Up   | 5'-CTGCCCTTCGGCAATGTGATCTCG-3'   |
| <i>aret</i> exon13 Down | 5'-ATCGAATCCGGGCTGGTTCGATTCC-3'  |
| <i>RhoGAP16F</i> Up     | 5'-AGGCCAAGACCTTCATTGGACAGC-3'   |
| <i>RhoGAP16F</i> Down   | 5'-GGATTTGAGTGGTTAGCAAAGCG-3'    |
| <i>fas</i> Up           | 5'-ATGCGGGCATGTACAAGTGTGTGG-3'   |
| <i>fas</i> Down         | 5'-GAGCGGCATGAGCCGGCGGATTGG-3'   |
| <i>Sdc</i> Up           | 5'-CAACGGGGAAAATGAAGCCAAAGC-3'   |
| <i>Sdc</i> Down         | 5'-GATCCCTCGATGCTATCATCGTCG-3'   |
| <i>hth</i> Up           | 5'-GTTGGGATCGGCGAACGGAGAAGG-3'   |
| <i>hth</i> Down         | 5'-GATGTATCTAGGGCAGGTGGCTGC-3'   |
| CG11760 Up              | 5'-CCTACTAGACCTCCTAGGAATCCG-3'   |
| CG11760 Down            | 5'-ACGAAGACGATGGCATAACCACACC-3'  |
| CG14796 Up              | 5'-TACGGCATCAACTACAAGTATCGG-3'   |
| CG14796 Down            | 5'-GGTGAATTGTTCTTGTCTTCTGTGG-3'  |
| CG5953 Up               | 5'-GCGGGCAACGGAGGAGCACCACCC-3'   |
| CG5953 Down             | 5'-ACTTCCTCCTCGCTCGGATCCACC-3'   |
| CG15593 Up              | 5'-AGGCGTATGGATATGGGTTTACC-3'    |
| CG15593 Down            | 5'-CTTGGCCATAATAAAGGCCGAGC-3'    |
| CG9080 Up*              | 5'-CGTCCAATATGAAACAGTACCTGG-3'   |
| CG3950 Up               | 5'-GCCAATCGTATTGCCTTTAAAGC-3'    |
| CG3950 Down             | 5'-CTCTGCAGCGACGTCGGCAGCGGC-3'   |
| CG14670 Up              | 5'-GACAGCGAGGAGTCCACCAAGTCG-3'   |
| CG14670 Down            | 5'-CGCAAATATCTCGAGGCGAGTTCG-3'   |

\*Oligo dT was used as the downstream primer for this gene.
